# Supplementary material for: Trans-splicing of mRNAs links gene transcription to translational control regulated by mTOR
Source: PubMed Central journal article supplement (PMC6883708; doi:10.1186/s12864-019-6277-x), 2019-11-29

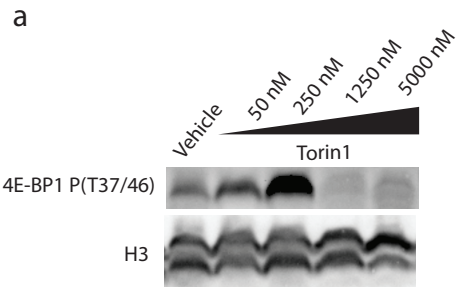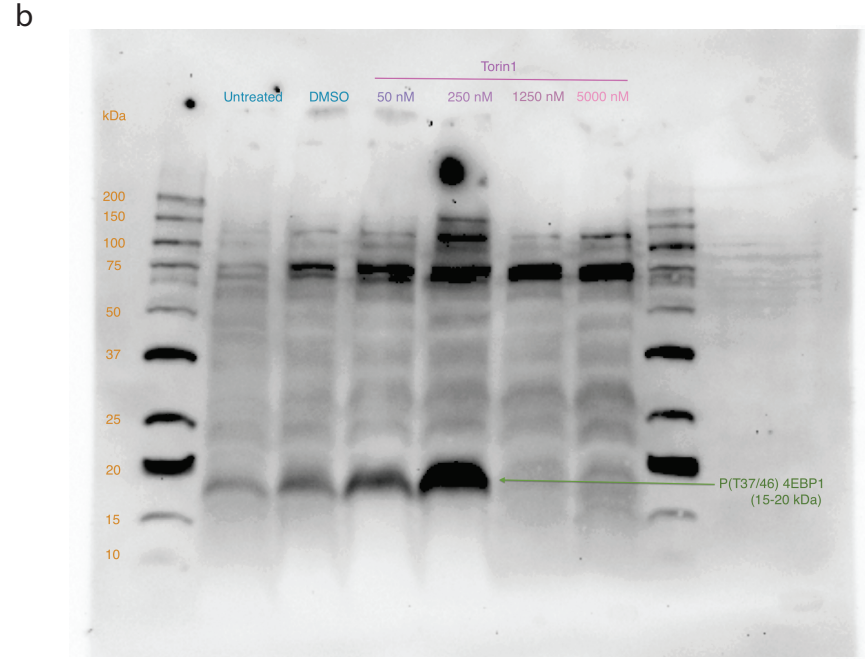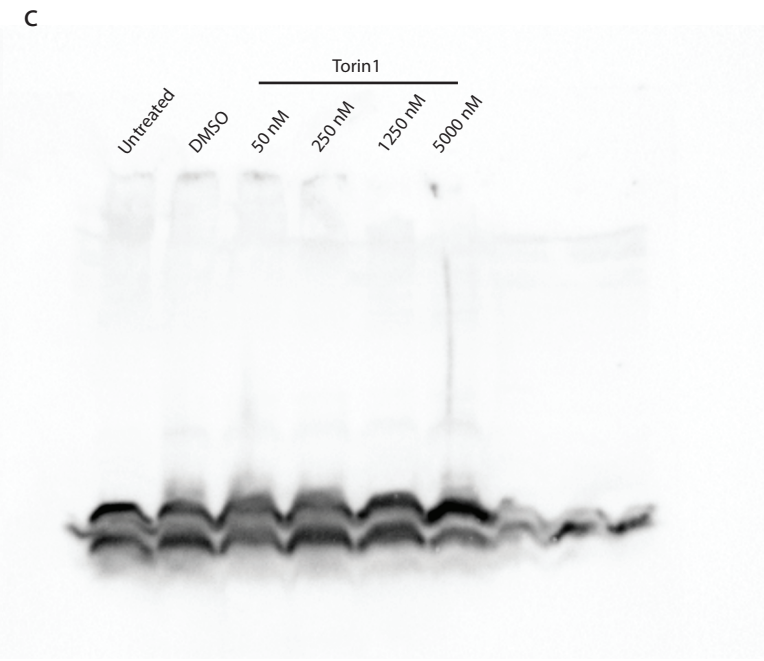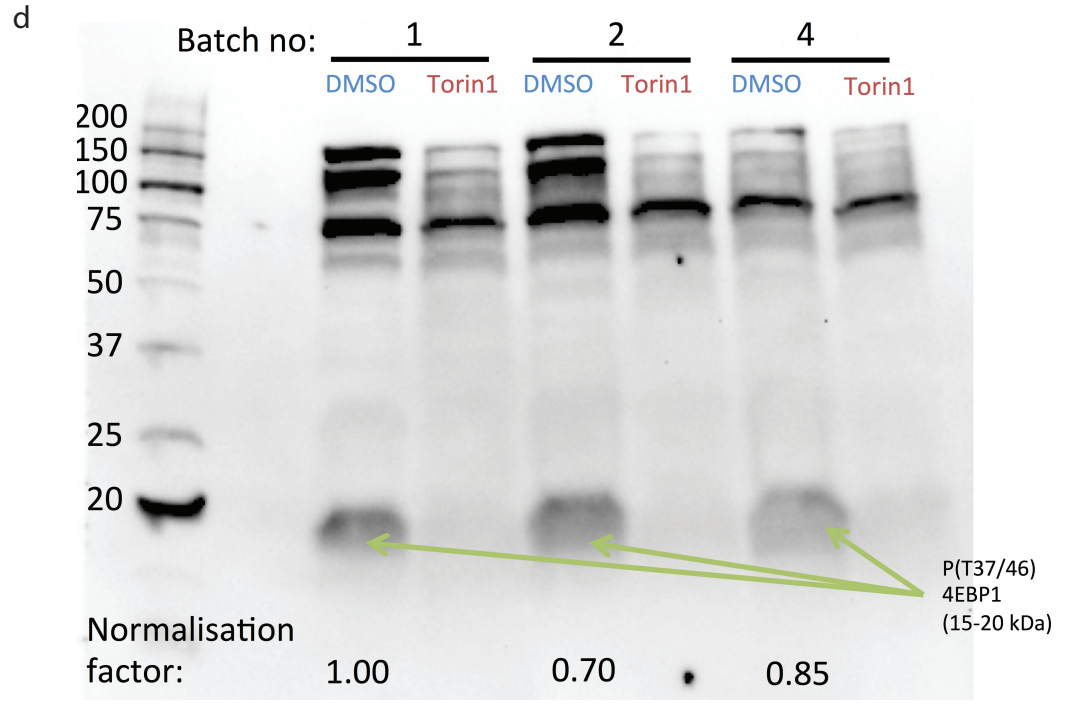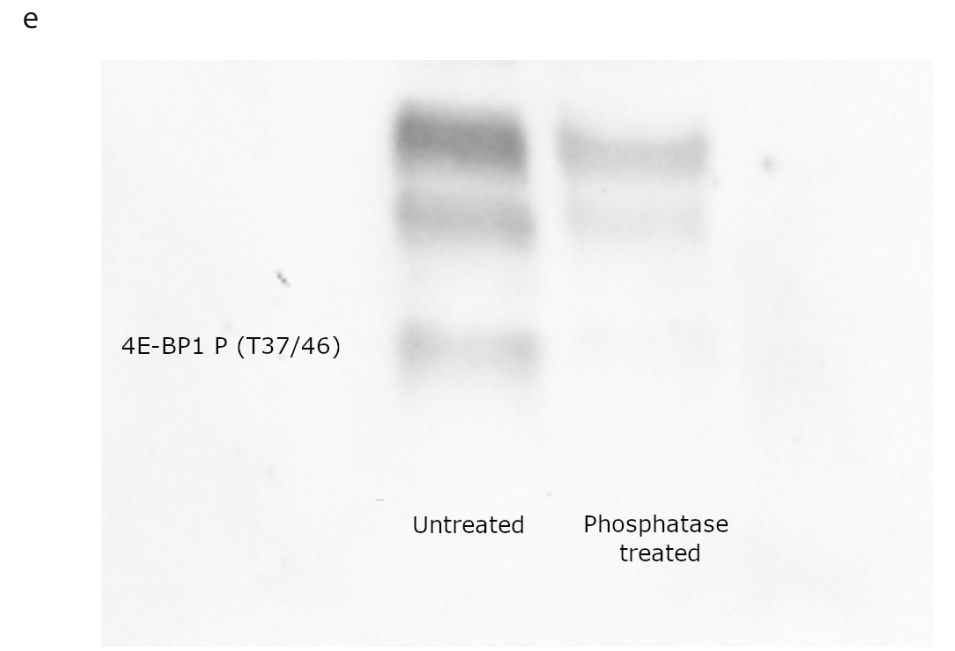

Supplement: 12864_2019_6277_MOESM1_ESM.pdf [file 12864_2019_6277_MOESM1_ESM.pdf]
